# Supplementary material for: Non-Achievement of Alanine Aminotransferase Normalization Associated with the Risk of Hepatocellular Carcinoma during Nucleos(t)ide Analogue Therapies: A Multicenter Retrospective Study
Source: MDPI journal article supplement (doi:10.3390/jcm11092354), 2022-04-22

# Non-Achievement of Alanine Aminotransferase Normalization is Associated with the Risk of Hepatocellular Carcinoma during Nucleos(t)ide Analogue Therapies: A Multicenter Retrospective Study

Jun Inoue, Tomoo Kobayashi, Takehiro Akahane, Osamu Kimura, Kosuke Sato, Masashi Ninomiya, Tomoaki Iwata, Satoshi Takai, Norihiro Kisara, Toshihiro Sato, Futoshi Nagasaki, Masahito Miura, Takuya Nakamura, Teruyuki Umetsu, Akitoshi Sano, Mio Tsuruoka, Masazumi Onuki, Hirofumi Niitsuma, Atsushi Masamune and THERME Study Group<sup>†</sup>

<sup>†</sup> THERME Study Group includes the following members: Yutaka Mano (Sendai Medical Center), Noriatsu Kanno (Abies Kanno Clinic), Shu Abe (JR Sendai Hospital), Atsushi Kanno (Sendai Red Cross Hospital), Takayuki Kogure (Tohoku Medical Pharmaceutical University Hospital), Takehiko Igarashi (Osaki City Hospital), Osamu Kido (Iwate Prefectural Chuo Hospital) and Noriyuki Obara (Japan Community Health Care Organization Sendai Hospital).

## Supporting information

**Figure S1.** Response rates for NA therapies based on ALT normalization and HBV DNA undetectability at 1 to 5 years of therapy. Three types of criteria for ALT normalization were as follows. WHO criteria: male,  $\leq 30$ ; female,  $\leq 19$ . AASLD criteria: male,  $\leq 35$ ; female,  $\leq 25$ . JSH criteria:  $\leq 30$ .

**Figure S2.** Cumulative incidences of HCC according to the achievement of ALT normalization 2 years after the start of NA therapy that were evaluated with different criteria and those according to the viral response. **(a-b)** Comparison of cumulative incidences of HCC between patients who achieved ALT normalization based on the criteria of WHO **(a)** and AASLD **(b)**. In these analyses, patients who developed HCC before 24 months and those whose observation periods were less than 24 months were excluded. **(c-d)** Comparison of cumulative incidences of HCC between patients with and without detectable HBV DNA at 1 year **(c)** and 2 years **(d)** of therapy.

**Figure S3.** Analysis of patients whose ALT was abnormal ( $>30$ ) at 1 year of therapy but was normalized at 2 years. **(a)** Numbers of patients according to the status of ALT normalization at 1 and 2 years. **(b)** Among only patients without ALT normalization at 1 year of therapy, a comparison of cumulative HCC incidences

between patients with and without ALT normalization at 2 years was performed.

**Table S1.** Comparison of baseline characteristics between patients with ALT normalization (JSH criteria,  $\leq 30$ ) and those without after propensity score matching at 1 year of NA therapies.

| Parameter                         | ALT $\leq 30$ at 1 year<br>(n = 119) | ALT $>30$ at 1 year<br>(n = 119) | <i>p</i> -Value |
|-----------------------------------|--------------------------------------|----------------------------------|-----------------|
| Age (years)                       | 50 (41-58)                           | 50 (40-61)                       | 0.788           |
| Sex (male/female)                 | 90/29                                | 92/27                            | 0.760           |
| Previous IFN (+/-)                | 14/105                               | 12/107                           | 0.678           |
| DM (+/-)                          | 9/110                                | 6/113                            | 0.424           |
| T-Bil (mg/dl)                     | 0.8 (0.6-1.1)                        | 0.8 (0.6-1.2)                    | 0.347           |
| AST (U/l)                         | 42 (29-82)                           | 51 (35-75)                       | 0.084           |
| ALT (U/l)                         | 56 (34-128)                          | 60 (44-109)                      | 0.295           |
| Alb (g/dl)                        | 4.2 (3.9-4.5)                        | 4.2 (3.9-4.5)                    | 0.879           |
| Cr (mg/dl)                        | 0.77 (0.67-0.88)                     | 0.78 (0.69-0.87)                 | 0.775           |
| PLT ( $\times 10^4/\mu\text{l}$ ) | 17.6 (13.6-22.4)                     | 16.2 (13.2-21.9)                 | 0.477           |
| AFP (ng/ml)                       | 4.2 (3.0-9.5)                        | 5.6 (3.1-11.4)                   | 0.385           |
| HBV DNA (log IU/ml)               | 5.3 (4.3-6.7)                        | 5.4 (4.8-6.5)                    | 0.451           |
| HBsAg (IU/ml)                     | 886 (151-2614)                       | 1247 (216-3770)                  | 0.377           |
| HBeAg (+/-)                       | 38/67                                | 40/64                            | 0.734           |
| HBcrAg (log U/ml)                 | 4.4 (3.0-6.4)                        | 3.5 (3.0-6.1)                    | 0.718           |
| FIB-4 index                       | 1.61 (1.08-2.83)                     | 2.10 (1.21-3.00)                 | 0.302           |
| HBV genotype (A/B/C/D)            | 2/35/60/0                            | 1/32/77/2                        | 0.232           |
| Initial NA<br>(LAM/ETV/TDF/TAF)   | 16/89/9/5                            | 12/88/13/6                       | 0.705           |
| Observation period (months)       | 72 (45-110)                          | 72 (44-108)                      | 0.817           |

Fig. S1

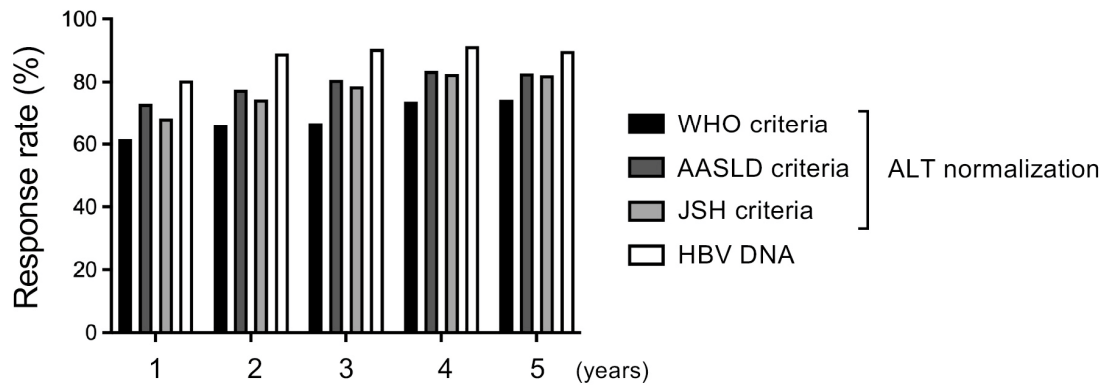

Fig. S2

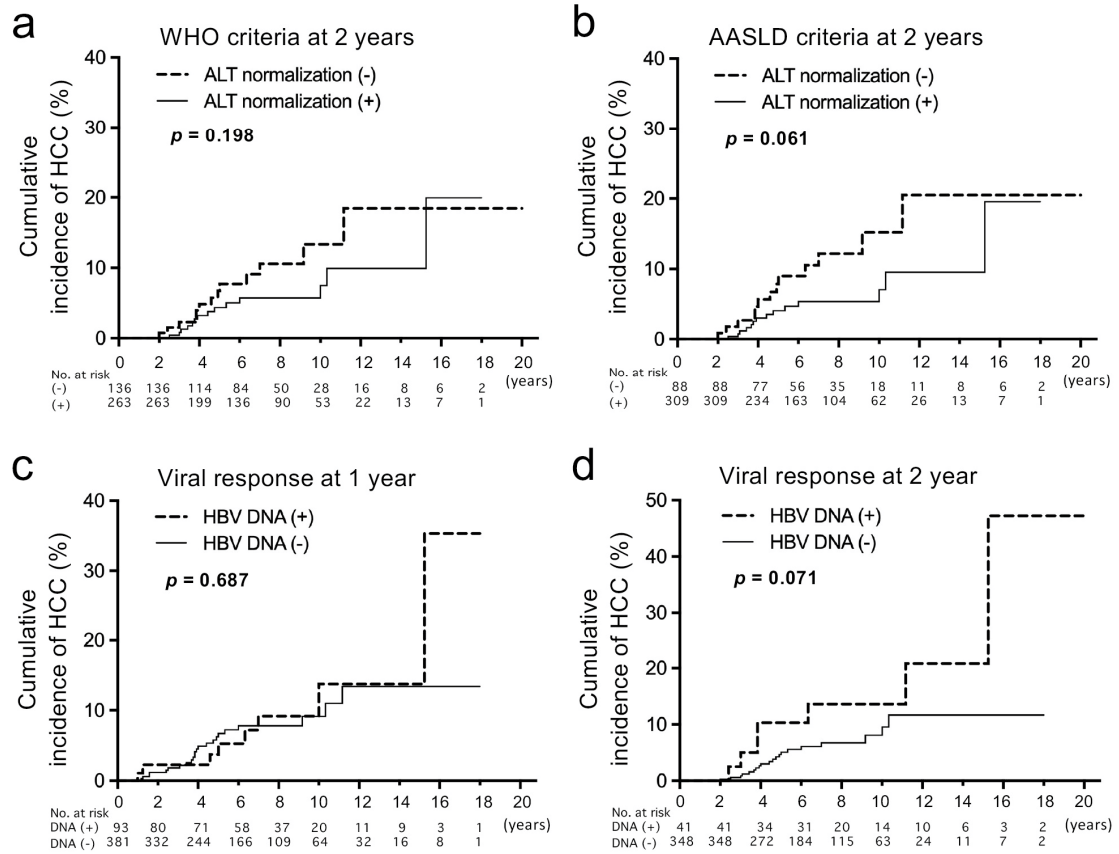

Fig. S3

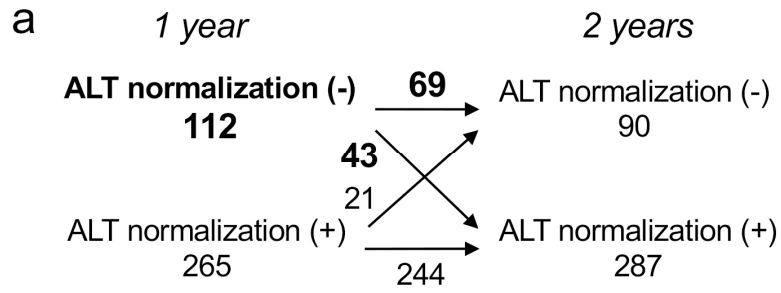

**b** Patients without ALT normalization at 1 year

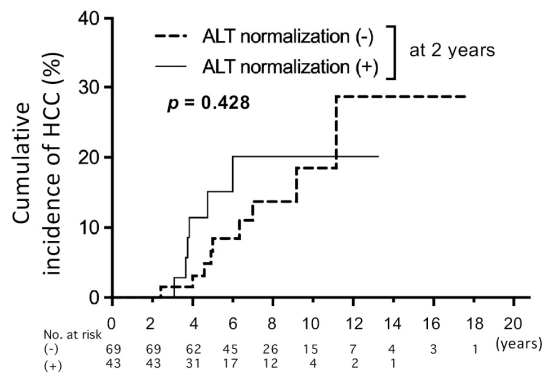

Supplement: s1 [file s1]
